# Supplementary material for: Genetic Variation and Genotype by Environment Interaction for Agronomic Traits in Maize (Zea mays L.) Hybrids
Source: MDPI journal article supplement (doi:10.3390/plants11111522), 2022-06-06
Supplement: s1 [file s1]

**Table S1:** Details of the studied genotypes

| Hybrid code | Pedigree                    |
|-------------|-----------------------------|
| G1          | BD-ISD-IL-E-8-B//BIL-22-B3  |
| G2          | BD-ISD-IL-E-8-B//BIL-28-B3  |
| G3          | BD-ISD-IL-E-8-B//BIL-79-B3  |
| G4          | BD-ISD-IL-E-16-B//BIL-22-B3 |
| G5          | BD-ISD-IL-E-16-B//BIL-28-B3 |
| G6          | BD-ISD-IL-E-16-B//BIL-79-B3 |
| G7          | BD-ISD-IL-E-18-B//BIL-22-B3 |
| G8          | BD-ISD-IL-E-18-B//BIL-28-B3 |
| G9          | BD-ISD-IL-E-18-B//BIL-79-B3 |
| G10         | BD-ISD-IL-E-19-B//BIL-22-B3 |
| G11         | BD-ISD-IL-E-19-B//BIL-28-B3 |
| G12         | BD-ISD-IL-E-19-B//BIL-79-B3 |
| G13         | BD-ISD-IL-E-22-B//BIL-22-B3 |
| G14         | BD-ISD-IL-E-22-B//BIL-28-B3 |
| G15         | BD-ISD-IL-E-22-B//BIL-79-B3 |
| G16         | BD-ISD-IL-E-24-B//BIL-22-B3 |
| G17         | BD-ISD-IL-E-24-B//BIL-28-B3 |
| G18         | BD-ISD-IL-E-24-B//BIL-79-B3 |
| G19         | BD-ISD-IL-E-25-B//BIL-22-B3 |
| G20         | BD-ISD-IL-E-25-B//BIL-28-B3 |
| G21         | BD-ISD-IL-E-25-B//BIL-79-B3 |
| G22         | BD-ISD-IL-E-29-B//BIL-22-B3 |
| G23         | BD-ISD-IL-E-29-B//BIL-28-B3 |
| G24         | BD-ISD-IL-E-29-B//BIL-79-B3 |
| G25         | BD-ISD-IL-E-34-B//BIL-22-B3 |
| G26         | BD-ISD-IL-E-34-B//BIL-28-B3 |
| G27         | BD-ISD-IL-E-34-B//BIL-79-B3 |
| G28         | BD-ISD-IL-E-43-B//BIL-22-B3 |
| G29         | BD-ISD-IL-E-43-B//BIL-28-B3 |
| G30         | BD-ISD-IL-E-43-B//BIL-79-B3 |
| G31         | BD-ISD-IL-E-44-B//BIL-22-B3 |
| G32         | BD-ISD-IL-E-44-B//BIL-28-B3 |
| G33         | BD-ISD-IL-E-44-B//BIL-79-B3 |
| G34         | BD-ISD-IL-E-45-B//BIL-22-B3 |
| G35         | BD-ISD-IL-E-45-B//BIL-28-B3 |
| G36         | BD-ISD-IL-E-45-B//BIL-79-B3 |
| G37         | BD-ISD-IL-E-46-B//BIL-22-B3 |
| G38         | BD-ISD-IL-E-46-B//BIL-28-B3 |
| G39         | BD-ISD-IL-E-46-B//BIL-79-B3 |
| G40         | BD-ISD-IL-E-54-B//BIL-22-B3 |
| G41         | BD-ISD-IL-E-54-B//BIL-28-B3 |
| G42         | BD-ISD-IL-E-54-B//BIL-79-B3 |
| G43         | BD-ISD-IL-E-57-B//BIL-22-B3 |
| G44         | BD-ISD-IL-E-57-B//BIL-28-B3 |
| G45         | BD-ISD-IL-E-57-B//BIL-79-B3 |

**Table S2:** Weather condition prevailed at vegetative and reproductive phase during cropping period at different locations

| Site     | Crop phase | Item | Temperature (°C) |       | Relative Humidity (%) |       | Rainfall (mm) | Rainy day |
|----------|------------|------|------------------|-------|-----------------------|-------|---------------|-----------|
|          |            |      | Min              | Max   | Min                   | Max   |               |           |
| Ishwardi | Veg.       | Mean | 19.37            | 33.8  | 33.8                  | 96.6  | 0             | 0         |
|          |            | Max  | 23.6             | 35.6  | 50                    | 100   |               |           |
|          |            | Min  | 16.3             | 31    | 24                    | 89    |               |           |
|          | Rep.       | Mean | 20.86            | 35.65 | 27.87                 | 90.93 | 1.3           | 3         |
|          |            | Max  | 22.8             | 37.5  | 50                    | 100   |               |           |
|          |            | Min  | 17.4             | 32.8  | 18                    | 75    |               |           |
| Jashore  | Veg.       | Mean | 16.19            | 33.07 | 48.07                 | 65.53 | 0             | 0         |
|          |            | Max  | 22               | 35    | 64                    | 90    |               |           |
|          |            | Min  | 12.6             | 30.4  | 40                    | 47    |               |           |
|          | Rep.       | Mean | 21.53            | 35.32 | 52.2                  | 75.8  | 8             | 1         |
|          |            | Max  | 23.8             | 37.8  | 69                    | 93    |               |           |
|          |            | Min  | 16.2             | 33.2  | 32                    | 51    |               |           |
| Borishal | Veg.       | Mean | 34.04            | 15.95 | 36.2                  | 93.4  | 0             | 0         |
|          |            | Max  | 35.6             | 18    | 42                    | 97    |               |           |
|          |            | Min  | 32               | 14.4  | 31                    | 87    |               |           |
|          | Rep.       | Mean | 35.97            | 21.52 | 47.47                 | 93.53 | 1.4           | 1         |
|          |            | Max  | 38.2             | 24    | 57                    | 95    |               |           |
|          |            | Min  | 32               | 17.4  | 41                    | 90    |               |           |

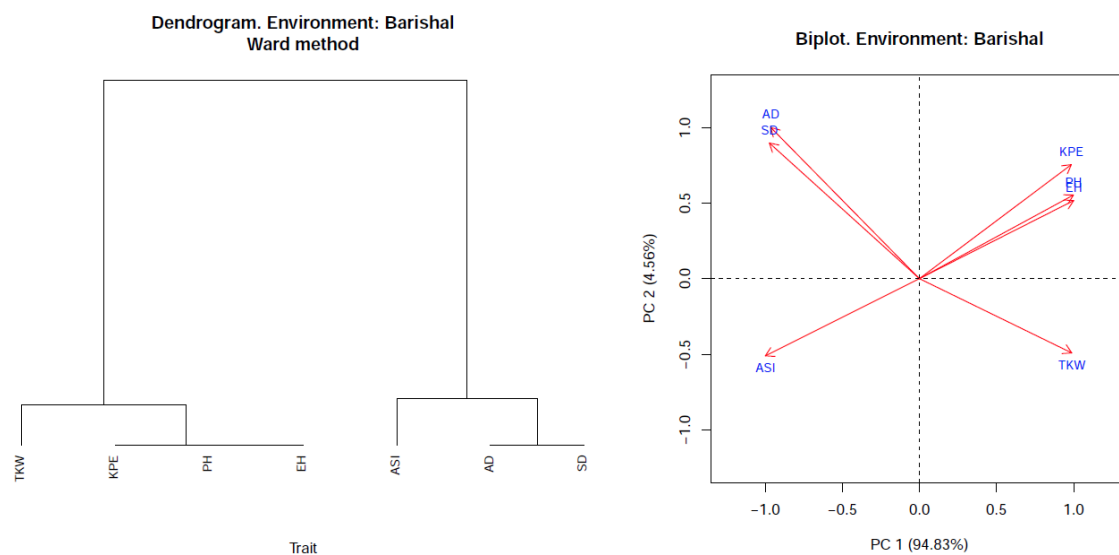

**Figure S1.** Dendrogram showing clustering of different traits (left); position of different traits depicted on biplot from principle component analysis on data of Barishal environment

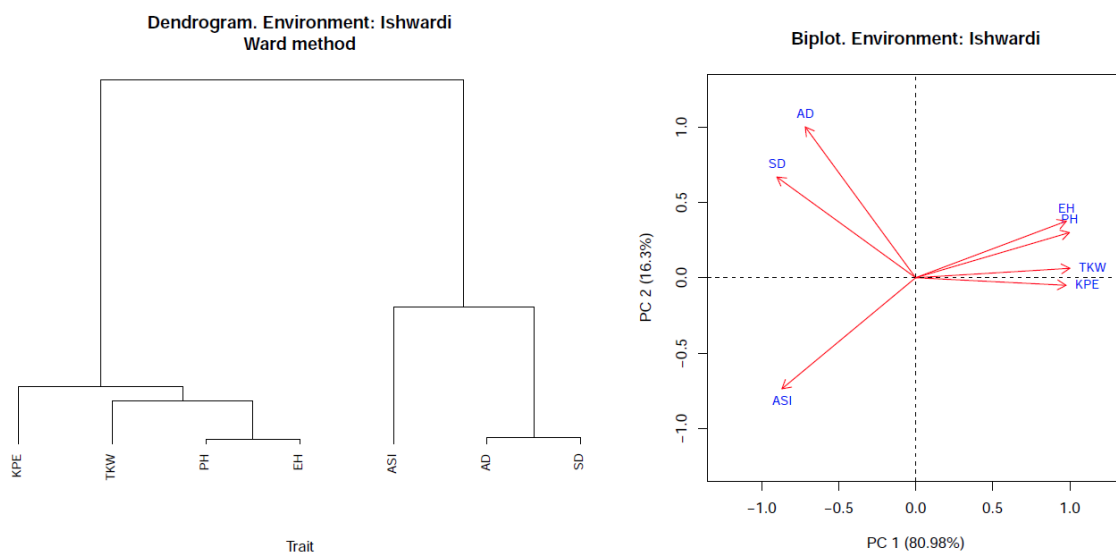

**Figure S2.** Dendrogram showing clustering of different traits (left); position of different traits depicted on biplot from principle component analysis on data of Ishwardi environment

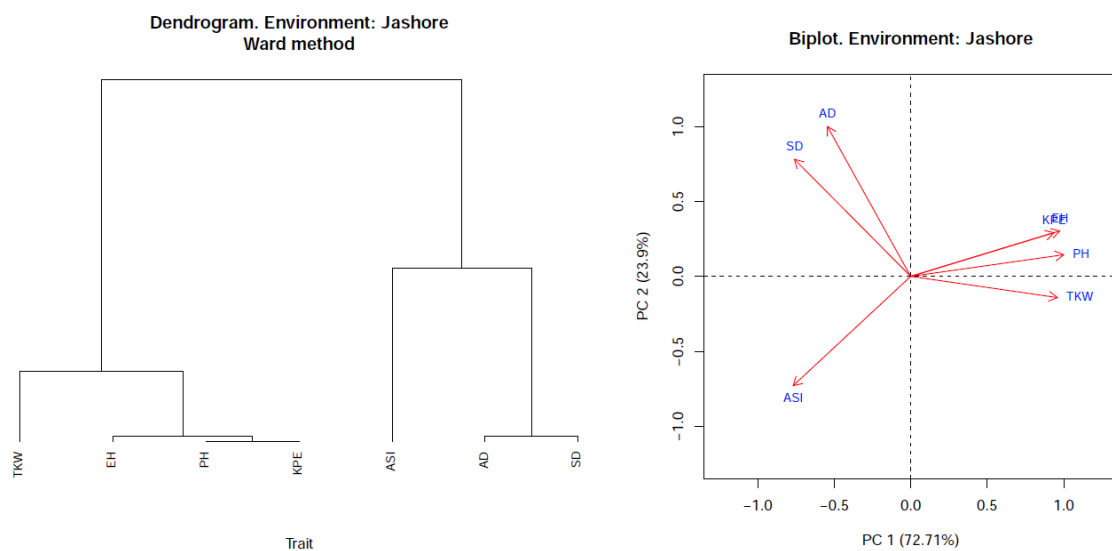

**Figure S3.** Dendrogram showing clustering of different traits (left); position of different traits depicted on biplot from principle component analysis on data of Jashore environment
